# Supplementary material for: In vitro antimicrobial and anticancer potentials of green synthesized luminescent carbon quantum dots derived from artichoke leaves
Source: Springer Nature journal article supplement (doi:10.1038/s41598-025-99841-9), 2025-05-09
Supplement: MOESM1 [file 41598_2025_99841_MOESM1_ESM.pdf]

## Statistical Analysis of “*In vitro* Antimicrobial and Anticancer Potentials of Green Synthesized Luminescent Carbon Quantum Dots Derived from Artichoke Leaves” Manuscript

**Table 1** Minimum inhibitory and bactericidal/fungicidal concentrations (MIC and MBC) of **CQDs** against bacterial and fungal pathogens strains

| Pathogenic Microorganism                            | MIC of CQDs (µg/mL)      | MBC (µg/mL)              |
|-----------------------------------------------------|--------------------------|--------------------------|
| <i>Staph. aureus</i> (ATCC 6538)                    | 62.5 ± 6.2 <sup>a</sup>  | 125 ± 12.5 <sup>a</sup>  |
| Methicillin-resistant <i>S. aureus</i> (ATCC 33591) | 31.25 ± 3.1 <sup>b</sup> | 62.5 ± 6.3 <sup>b</sup>  |
| <i>Escherichia coli</i> (ATCC 8739)                 | 15.62 ± 1.6 <sup>c</sup> | 15.62 ± 1.8 <sup>c</sup> |
| <i>Klebsiella pneumoniae</i> (ATCC 13883)           | 62.5 ± 5.8 <sup>a</sup>  | 125 ± 15.0 <sup>a</sup>  |
| <i>Candida albicans</i> (ATCC 10221)                | 15.62 ± 2.0 <sup>c</sup> | 62.5 ± 7.0 <sup>b</sup>  |
| <i>F-value</i>                                      | 95.46                    | 69.66                    |
| <i>p-value</i>                                      | < 0.001                  | < 0.001                  |

Values are presented as mean ± standard deviation. Different superscript letters (a, b, c) within the same column indicate statistically significant differences between means at  $p < 0.05$  (ANOVA followed by Tukey post hoc test). F-value and p-value are statistics calculated in a one way ANOVA (Analysis of Variance) test.

### Comment on results

The sample demonstrated varying degrees of antimicrobial activity against the tested bacterial and fungal strains, as reflected in both **MIC** (Minimum Inhibitory Concentration) and **MBC** (Minimum Bactericidal/Fungicidal Concentration) values.

#### 1. Highest Sensitivity (Lowest MIC/MBC):

- *Escherichia coli* (ATCC 8739) exhibited the **highest sensitivity** to the sample, with both MIC and MBC values at **15.62 µg/mL**. This suggests the sample has strong bacteriostatic and bactericidal activity against *E. coli*.

- *Candida albicans* also showed good sensitivity (MIC = 15.62 µg/mL), though its MBC was higher (62.5 µg/mL), indicating a stronger inhibitory than fungicidal effect.

#### 2. Intermediate Sensitivity:

- **Methicillin-resistant Staphylococcus aureus (MRSA)** showed moderate sensitivity (MIC = 31.25 µg/mL, MBC = 62.5 µg/mL), suggesting the sample could be effective even against drug-resistant strains.

#### 3. Lower Sensitivity (Highest MIC/MBC):

- *Staphylococcus aureus* and *Klebsiella pneumoniae* both had MICs of 62.5 µg/mL and MBCs of 125 µg/mL, indicating lower susceptibility and suggesting that higher concentrations of the sample are needed to inhibit or kill these organisms.

**Statistical Significance:** The high **F-values** (MIC: 95.46, MBC: 69.66) and **p-values** < **0.001** indicate that the differences in antimicrobial susceptibility among the microorganisms are **highly statistically significant**. This confirms that the sample's effectiveness varies considerably between different microbial strains.

**Table 2. Antimicrobial Activity Test**

| Pathogenic microorganism                                 | Sample   | Control  | t-value | p-value |
|----------------------------------------------------------|----------|----------|---------|---------|
| <i>Staph. aureus</i> (ATCC 6538)                         | 21 ± 0.1 | 23 ± 0.1 | 24.5    | < 0.001 |
| <i>Methicillin-resistant S. aureus</i> ATCC 33591 (MRSA) | 25 ± 0.2 | 22 ± 0.2 | 18.37   | < 0.001 |
| <i>Escherichia coli</i> (ATCC 8739)                      | 31 ± 0.2 | 27 ± 0.1 | 30.98   | < 0.001 |
| <i>K. pneumoniae</i> (ATCC 13883)                        | 22 ± 0.1 | 21 ± 0.1 | 12.25   | < 0.001 |
| <i>Candida albicans</i> (ATCC 10221)                     | 33 ± 0.1 | 31 ± 0.1 | 24.5    | < 0.001 |

Values represent the diameter of inhibition zones (mm), expressed as mean ± SD. *t*-value and *p*-value are from an independent *t*-test comparing the sample and control groups. A *p*-value < 0.001 means the difference is highly statistically significant.

#### **Comment on results**

All tested organisms show **statistically significant differences** between the sample and control (*p* < 0.001). This confirms that the sample exhibits **true antimicrobial activity**

- The sample was more effective than the control against: MRSA (25 mm vs. 22 mm), *E. coli* (31 mm vs. 27 mm), *K. pneumoniae* (22 mm vs. 21 mm), *C. albicans* (33 mm vs. 31 mm).
- The inhibition zone for *S. aureus* was slightly **smaller** in the sample (21 mm) than the control (23 mm), but this difference is still statistically significant. This suggests the control agent may be more potent against this particular strain.

**Table 3. Effect of Sample (CQDs) on MCF-7 Cells**

| Sample conc.<br>( $\mu\text{g/ml}$ ) | MCF-7            |                  |
|--------------------------------------|------------------|------------------|
|                                      | Viability %      | Inhibitory %     |
| 0*                                   | $100 \pm 0$      | $0 \pm 0$        |
| 7.8                                  | $92.06 \pm 1.68$ | $7.94 \pm 1.68$  |
| 15.6                                 | $85.11 \pm 0.28$ | $14.89 \pm 0.28$ |
| 31.25                                | $75.13 \pm 0.97$ | $24.87 \pm 0.97$ |
| 62.5                                 | $59.58 \pm 1.34$ | $40.42 \pm 1.34$ |
| 125                                  | $41.98 \pm 1.67$ | $58.02 \pm 1.67$ |
| 250                                  | $26.45 \pm 1.4$  | $73.55 \pm 1.4$  |
| 500                                  | $10.06 \pm 0.66$ | $89.94 \pm 0.66$ |
| 1000                                 | $3.51 \pm 0.25$  | $96.49 \pm 0.25$ |

\*0 = Non-treated cell control

**Table 4. Effect of Reference Drug (Cisplatin) on MCF-7 Cells**

| Reference<br>conc. ( $\mu\text{g/ml}$ ) | MCF-7            |                  |
|-----------------------------------------|------------------|------------------|
|                                         | Viability %      | Inhibitory %     |
| 0                                       | $100 \pm 0$      | $0 \pm 0$        |
| 0.5                                     | $56.9 \pm 0.56$  | $43.1 \pm 0.56$  |
| 1                                       | $48.72 \pm 0.87$ | $51.28 \pm 0.87$ |
| 2                                       | $43.7 \pm 1.29$  | $56.3 \pm 1.29$  |
| 3.9                                     | $39.6 \pm 0.75$  | $60.4 \pm 0.75$  |
| 7.8                                     | $34.48 \pm 0.57$ | $65.52 \pm 0.57$ |
| 15.6                                    | $28.61 \pm 0.67$ | $71.39 \pm 0.67$ |
| 31.25                                   | $21.3 \pm 0.52$  | $78.7 \pm 0.52$  |
| 62.5                                    | $12.43 \pm 0.5$  | $87.57 \pm 0.5$  |
| 125                                     | $7.5 \pm 0.57$   | $92.5 \pm 0.57$  |
| 250                                     | $3.88 \pm 0.14$  | $96.12 \pm 0.14$ |
| 500                                     | $1.55 \pm 0.19$  | $98.45 \pm 0.19$ |
| 1000                                    | $0.61 \pm 0.09$  | $99.39 \pm 0.09$ |

| Sample    | IC <sub>50</sub> ( $\mu\text{g/ml}$ ) | t-test          |
|-----------|---------------------------------------|-----------------|
| CQDs      | $96.59 \pm 5.3$                       | t-value = 31.29 |
| Cisplatin | $0.92 \pm 0.05$                       | p-value < 0.001 |

**Table 3: Effect of Sample (CQDs) on MCF-7 Cells**

- The viability of cells decreases with increasing concentration of **CQDs**.
- At **1000 µg/ml**, viability is **3.51%**, with **96.49% inhibition**.
- **IC<sub>50</sub> for CQDs = 96.59 ± 5.3 µg/ml**, meaning this is the concentration where cell viability is reduced by 50%.

**Table 4: Effect of Reference Drug (Cisplatin) on MCF-7 Cells**

- Shows a much stronger cytotoxic effect at much lower concentrations.
- At **1000 µg/ml**, viability is only **0.61%**, with **99.39% inhibition**.
- **IC<sub>50</sub> for Cisplatin = 0.92 ± 0.05 µg/ml**, showing it's much more potent than CQDs.

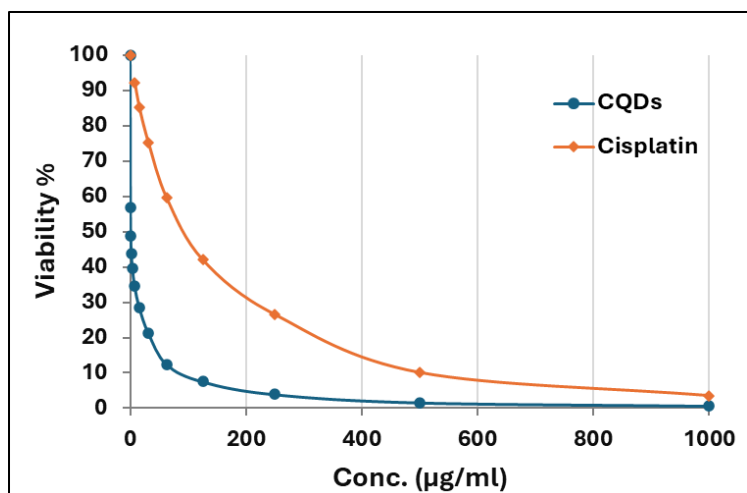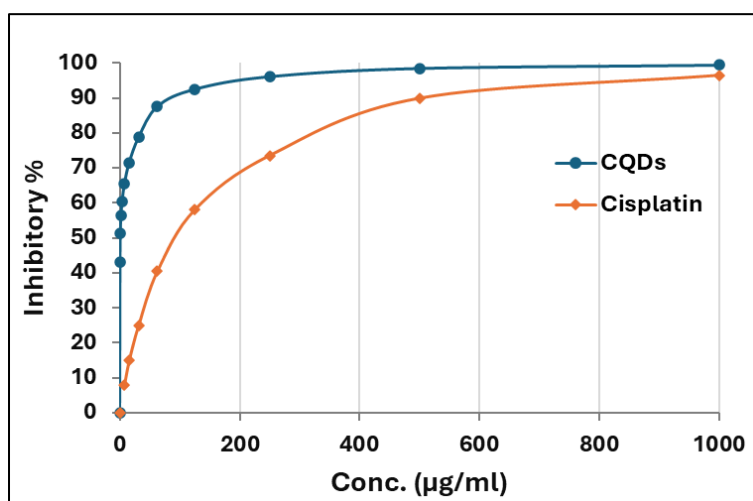

**CQDs** do exhibit dose-dependent cytotoxicity, but require much higher doses to reach similar levels of inhibition.

**Cisplatin** is significantly more effective at inhibiting MCF-7 breast cancer cells compared to CQDs.

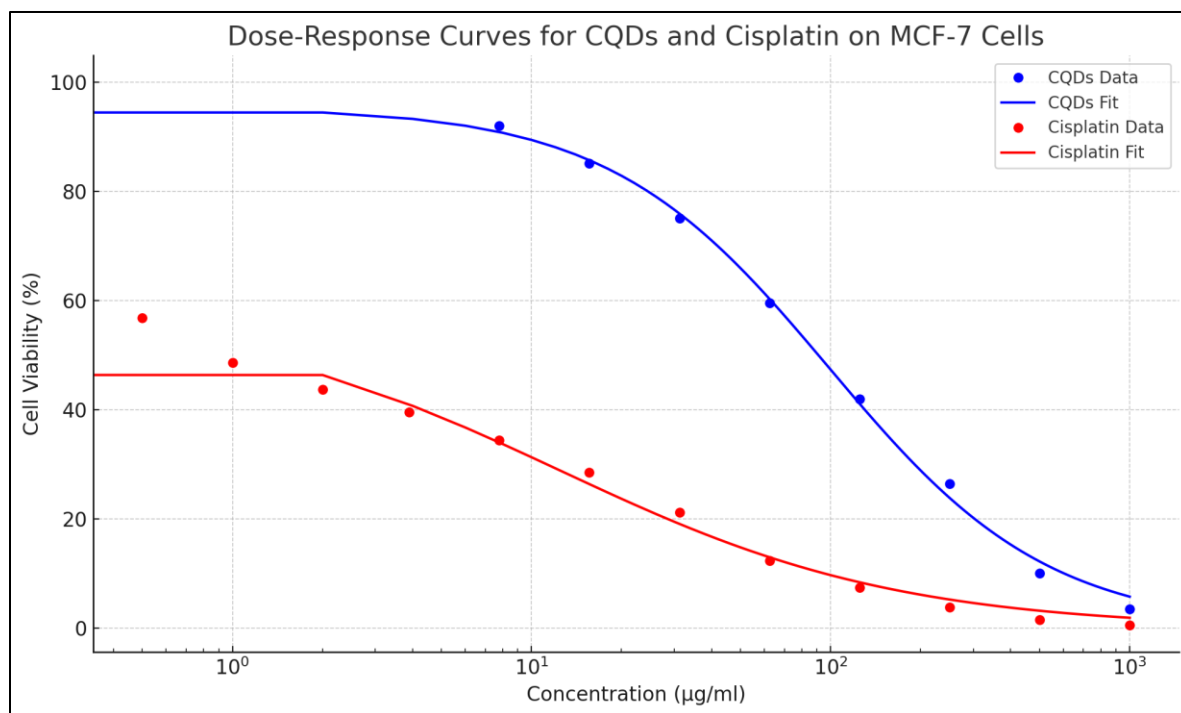

The plot above shows the **dose-response curves** of **CQDs** and **Cisplatin** on MCF-7 breast cancer cells using a four-parameter logistic (4PL) model. Here's a breakdown of the key findings.

## Statistical Analysis

All experimental data were expressed as **mean  $\pm$  standard deviation (SD)**. The antimicrobial efficacy of the sample was assessed using two main statistical approaches:

**One-way Analysis of Variance (ANOVA)** followed by **Tukey's post hoc test** was employed to compare the **minimum inhibitory concentration (MIC)** and **minimum bactericidal/fungicidal concentration (MBC)** values across different microbial strains. A significance level of  **$p < 0.05$**  was considered statistically significant. The presence of different superscript letters within the same column in Table 1 indicates significant differences among the tested microorganisms. F-values and p-values were reported to confirm the variation among groups.

**Independent two-sample t-tests** were used to compare the **diameter of inhibition zones** between the sample and control groups for each tested pathogen. All comparisons showed statistically significant differences with  **$p < 0.001$** , confirming the antimicrobial activity of the sample.

For the **cytotoxicity assay on MCF-7 breast cancer cells**, viability and inhibition percentages were calculated across a range of sample concentrations. The **IC<sub>50</sub> values** (concentration that inhibits 50% of cell viability) for both the test sample (CQDs) and reference drug (Cisplatin) were determined using a **four-parameter logistic (4PL) regression model**. The difference in IC<sub>50</sub> values between CQDs and Cisplatin was evaluated with a **t-test**, yielding  **$p < 0.001$** , indicating a statistically significant difference in cytotoxic potency.

All statistical analyses were performed using GraphPad prism V.8.3 and MS Excel 365 software.
